# Supplementary material for: Biogenic ZnO Nanoparticles Synthesized from Origanum vulgare Abrogates Quorum Sensing and Biofilm Formation in Opportunistic Pathogen Chromobacterium violaceum
Source: MDPI journal article supplement (doi:10.3390/pharmaceutics13111743), 2021-10-20
Supplement: s1 [file s1]

Supplementary Material

# Biogenic ZnO Nanoparticles Synthesized from *Origanum vulgare* Abrogates Quorum Sensing and Biofilm Formation in Opportunistic Pathogen *Chromobacterium violaceum*

Majid Rasool Kamli <sup>1,2,\*</sup>, Maqsood Ahmad Malik <sup>3,\*</sup>, Vartika Srivastava <sup>4</sup>, Jamal S. M. Sabir <sup>1,2</sup>, Ehab Hussain Matter <sup>1</sup> and Aijaz Ahmad <sup>4,5</sup>

<sup>1</sup> Department of Biological Sciences, Faculty of Science, King Abdulaziz University, Jeddah 21589, Saudi Arabia; jsabir2622@gmail.com (J.S.M.S.); ematter@kau.edu.sa (E.H.M.)

<sup>2</sup> Center of excellence in Bionanoscience Research, King Abdulaziz University, Jeddah 21589, Saudi Arabia

<sup>3</sup> Department of Chemistry, Faculty of Science, King Abdulaziz University, Jeddah 21589, Saudi Arabia

<sup>4</sup> Clinical Microbiology and Infectious Diseases, School of Pathology, Faculty of Health Sciences, University of the Witwatersrand, Johannesburg 2193, South Africa; vartika.srivastava@wits.ac.za (V.S.); Aijaz.Ahmad@wits.ac.za (A.A.)

<sup>5</sup> Infection Control Unit, Charlotte Maxeke Johannesburg Academic Hospital, National Health Laboratory Service, Johannesburg 2193, South Africa

\* Correspondence: mkamli@kau.edu.sa (M.R.K.); mamalik@kau.edu.sa (M.A.M.)

**Table S1.** List of primers employed for RT-qPCR experiment.

| Gene        | Forward Primer                 | Reverse Primer               |
|-------------|--------------------------------|------------------------------|
| <i>cviL</i> | 5'-GGATCCCCGTAGGCAAAGAACTAA-3' | 5'-GAATTCTTGTGTCTGAACGCCA-3' |
| <i>vioA</i> | 5'-GGATCCGCCCCAAAGCCAGACTA-3'  | 5'-GAATTCTGAACGGCACGATTGA-3' |
| <i>vioB</i> | 5'-GGCCTATTACGAGCTGGTCT-3'     | 5'-TGGGCCAGGTATTTGAGGAA-3'   |
| <i>vioD</i> | 5'-GCCGCAACAAGTACATCTGG-3'     | 5'-AACACCTTGGCGACGTATTC-3'   |
| <i>vioE</i> | 5'-TGGAAGCAGAAGGTGGCC-3'       | 5'-GCGGCGTCCAGGTACAAC-3'     |
| <i>16S</i>  | 5'-GCGCAACCCTTGCCTTAGTT-3'     | 5'-TGTCACCGGCAGTCTCCTTAG-3'  |
